# Supplementary material for: Development of transgenic Caenorhabditis elegans expressing human transthyretin as a model for drug screening
Source: PubMed Central journal article supplement (PMC6294829; doi:10.1038/s41598-018-36357-5), 2018-12-14
Supplement: 41598_2018_36357_MOESM1_ESM.pdf [file 41598_2018_36357_MOESM1_ESM.pdf]

## Supplementary Information

### **Development of transgenic *Caenorhabditis elegans* expressing human transthyretin as a model for drug screening**

**Yukimoto Tsuda<sup>1</sup>, Kunitoshi Yamanaka<sup>2\*</sup>, Risa Toyashima<sup>1</sup>, Mitsuharu Ueda<sup>1\*</sup>, Teruaki Masuda<sup>1</sup>, Yohei Misumi<sup>1</sup>, Teru Ogura<sup>2</sup>, & Yukio Ando<sup>1</sup>**

<sup>1</sup> Department of Neurology, Graduate School of Medical Sciences, Kumamoto University, 1-1-1 Honjo, Chuo-ku, Kumamoto 860-8556, Japan

<sup>2</sup> Department of Molecular Cell Biology, Institute of Molecular Embryology and Genetics, Kumamoto University, 2-2-1 Honjo, Chuo-ku, Kumamoto 860-0811, Japan

\*Correspondence should be addressed to K.Y. (email: [yamanaka@gpo.kumamoto-u.ac.jp](mailto:yamanaka@gpo.kumamoto-u.ac.jp)) or M.U. (email: [mitt@rb3.so-net.ne.jp](mailto:mitt@rb3.so-net.ne.jp)).

## Tsuda et al. Supplementary Figure S1

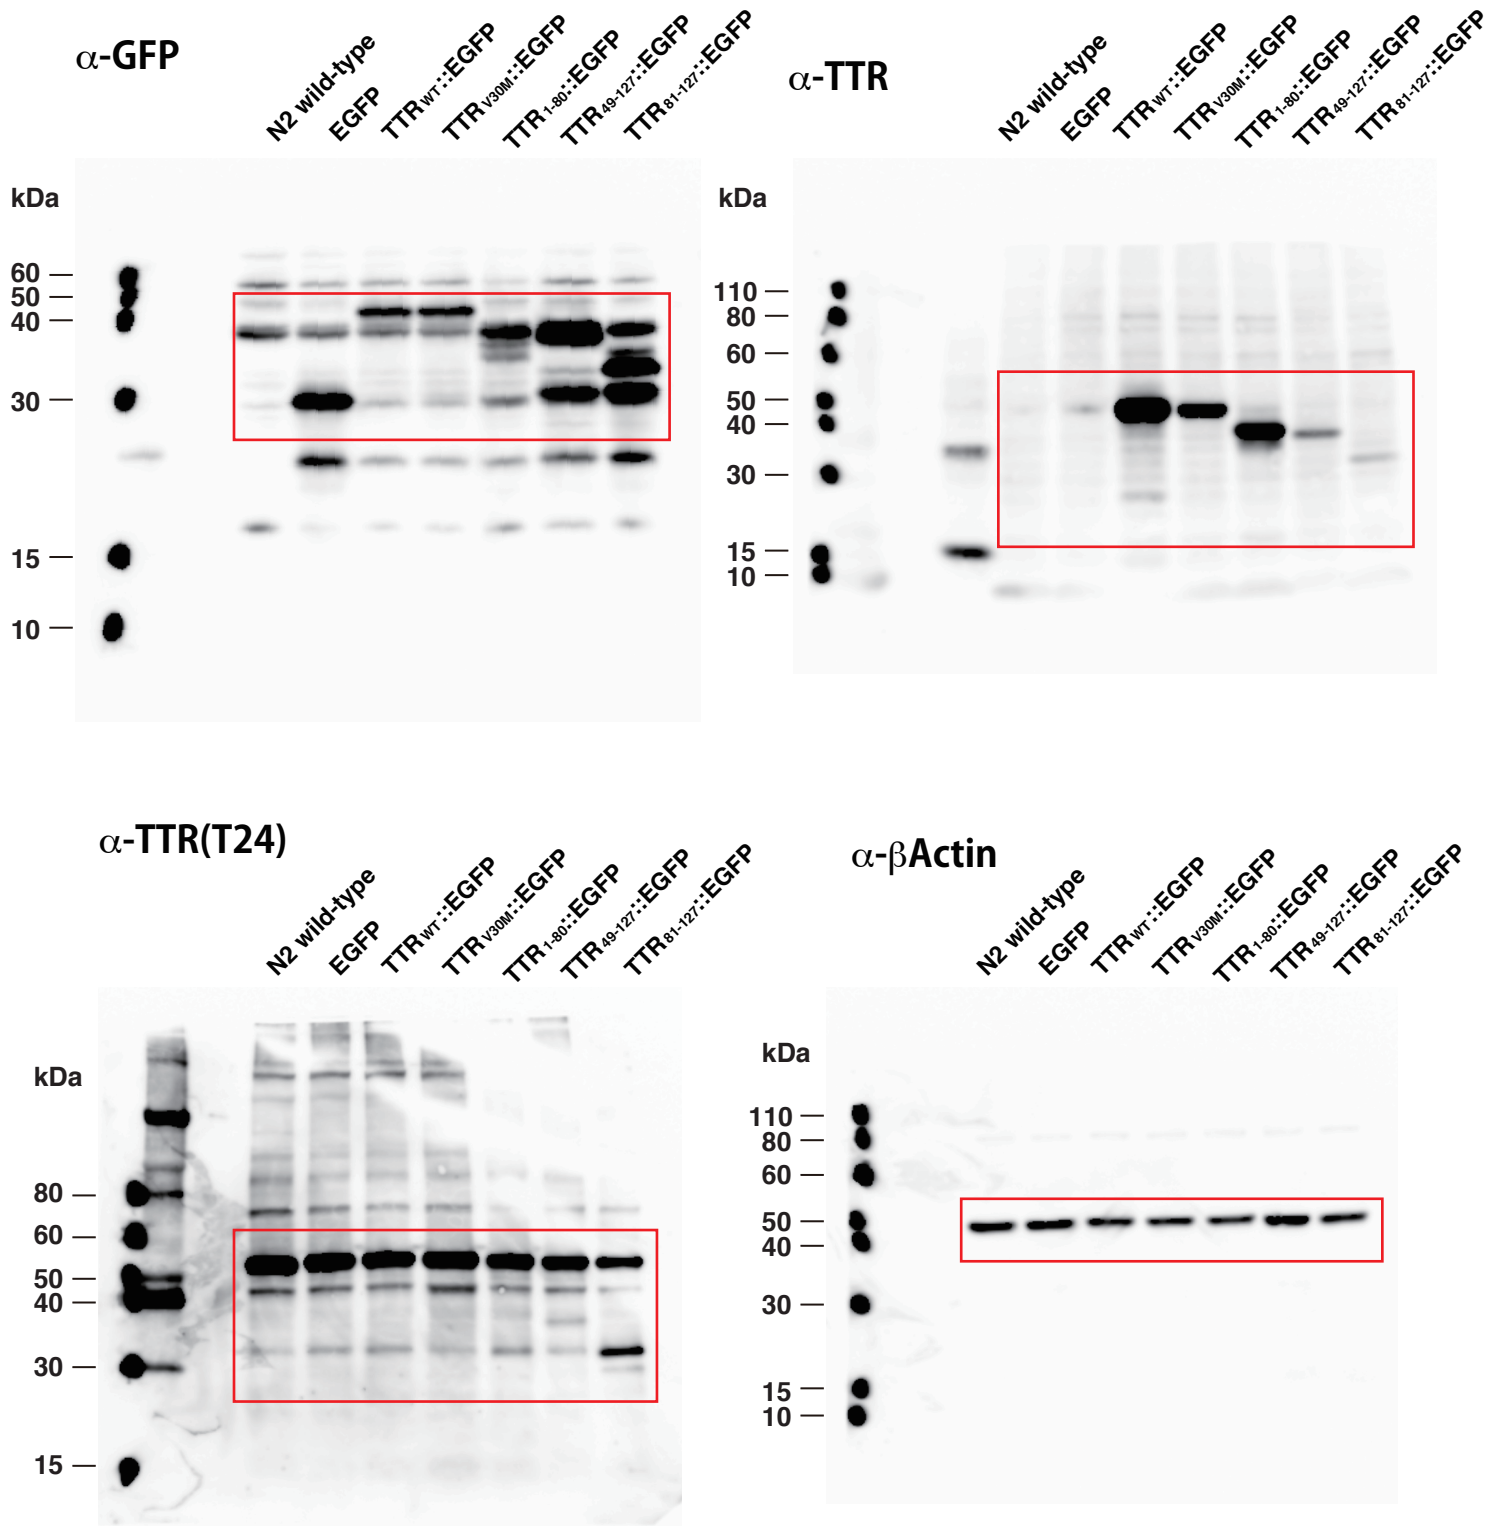

**Supplementary Figure S1.** Full blots for detection of EGFP, TTR, C-terminal fragments of TTR and  $\beta$ -actin. Portions (red squares) are used in Figure 1b. The positions of molecular markers are shown to the left of the blots.

## Tsuda et al. Supplementary Figure S2

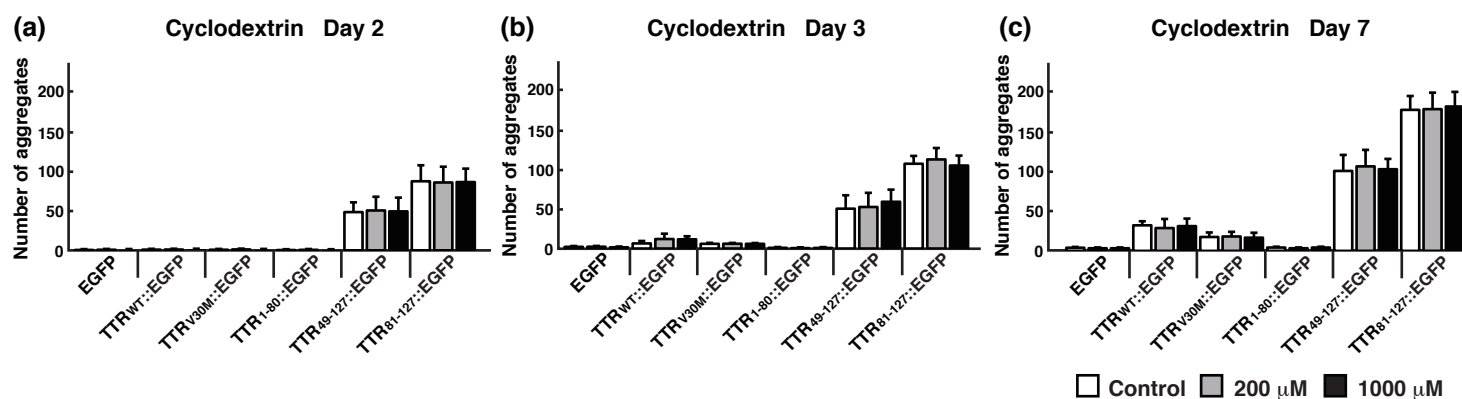

**Supplementary Figure S2.** Effects of  $\beta$ -cyclodextrin on the TTR::EGFP aggregate formation in transgenic worms. Six kinds of transgenic worms expressing EGFP, TTR<sub>WT</sub>::EGFP, TTR<sub>V30M</sub>::EGFP, TTR<sub>1-80</sub>::EGFP, TTR<sub>49-127</sub>::EGFP, or TTR<sub>81-129</sub>::EGFP were used. The number of aggregates in a worm was counted on days 2 (a), 3 (b) and 7 (c). The day when eggs were laid was defined as day 0. Worms were grown in the absence of drug (white bars) or in the presence of the drug at 200  $\mu$ M (gray bars) or 1000  $\mu$ M (black bars). Plots represent of at least three independent experiments (16 animals for each strain). Error bars indicate SD.

## Tsuda et al. Supplementary Figure S3

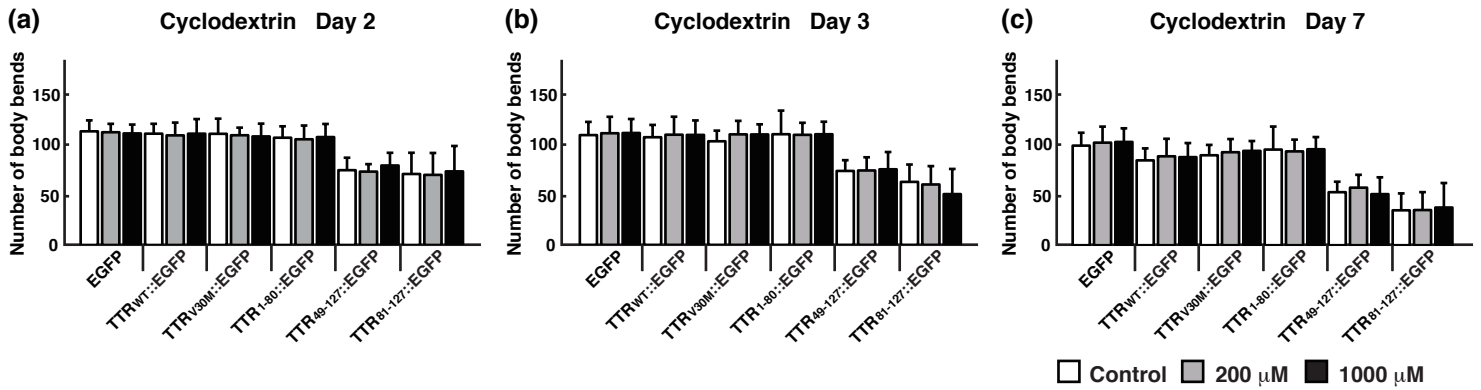

**Supplementary Figure S3.** Effects of  $\beta$ -cyclodextrin on motility of transgenic worms. Six kinds of transgenic worms expressing EGFP, TTR<sub>WT</sub>::EGFP, TTR<sub>V30M</sub>::EGFP, TTR<sub>1-80</sub>::EGFP, TTR<sub>49-127</sub>::EGFP, or TTR<sub>81-129</sub>::EGFP were used. The number of body bends of worms per minute was counted in M9 buffer on days 2 (a), 3 (b) and 7 (c). The day when eggs were laid was said to be day 0. Worms were grown in the absence of drug (white bars) or in the presence of drug at 200  $\mu$ M (gray bars) or 1000  $\mu$ M (black bars). Plots represent at least three independent experiments (16 animals for each strain). Error bars indicate SD.

**Supplementary Table S1. Oligonucleotide primers used in this study.**

| <b>Primer name</b>      | <b>Sequence (5' to 3')</b>                   |
|-------------------------|----------------------------------------------|
| TTR-5'- <i>SalI</i>     | CCTGGTCGACGCCACCATGGCTTCTCATCGTCTGCTCC       |
| TTR-3'- <i>BamHI</i>    | CCAGGGATCCCGTTCCCTGGGATTGGTGACGAC            |
| EGFP-3'- <i>EcoRV</i>   | CCTGGATATCCGCTTTACTTGTACAGCTCG               |
| ns-fTTR-5'- <i>SalI</i> | CCTGGTCGACGCCACCATGGGCCCCTACGGGCACCGGTGAATCC |
| V30M-down               | CCTGCCATCAATGTGGCCATGCATGTGTTTCAGAAAGG       |
| V30M-up                 | CCTTTCTGAACACATGCATGGCCACATTGATGGCAGG        |
| 1-80-down               | CCAAATCTTACTGGAAGCGGGATCCACCGGTTCGC          |
| 1-80-up                 | GCGACCGGTGGATCCCGCTTCCAGTAAGATTTGG           |
| ns49-127-down           | GCGTCGACGCCACCATGACCAGTGAGTCTGGAGAG          |
| ns49-127-up             | CTCTCCAGACTCACTGGTCATGGTGGCGTCGACGC          |
| nsEGFP-up               | CTAGCGTCGACGCCACCATGGTGAGCAAGGGCGAGGAGCTG    |
| nsEGFP-down             | CAGCTCCTCGCCCTTGCTCACCATGGTGGCGTCGACGCTAG    |
| EGFP forward            | ACGTAAACGGCCACAAGTTC                         |
| EGFP reverse            | AAGTCGTGCTGCTTCATGTG                         |
| $\beta$ -Actin forward  | GTGTGACGACGAGGTTGCCGCTCTTGTTGTAGAC           |
| $\beta$ -Actin reverse  | GGTAAGGATCTTCATGAGGTAATCAGTAAGATCAC          |
